# Supplementary material for: Single-crystal CoSe2 nanorods as an efficient electrocatalyst for dye-sensitized solar cells
Source: Royal Society of Chemistry journal article supplement (doi:10.1039/c4ta02238f), 2014-01-01
Supplement: c4ta02238f1.pdf [file c4ta02238f1.pdf]

## Single-Crystal CoSe<sub>2</sub> Nanorods as Efficient Electrocatalyst for Dye-Sensitized Solar Cells

Hong Sun, Lu Zhang and Zhong-Sheng Wang\*

Department of Chemistry, Lab of Advanced Materials, Collaborative  
Innovation Center of Chemistry for Energy Materials, Fudan University, 2205  
Songhu Road, Shanghai 200438, P. R. China

\* Corresponding author: E-mail: E-mail: zs.wang@fudan.edu.cn, Fax/Tel:  
(+86)21-5163-0345.

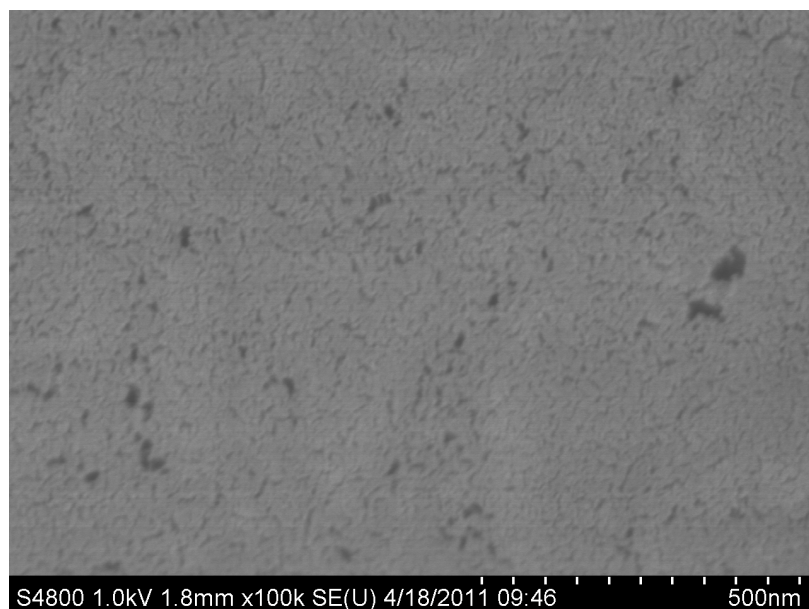

**Figure S1.** Drop-casted Pt film on FTO

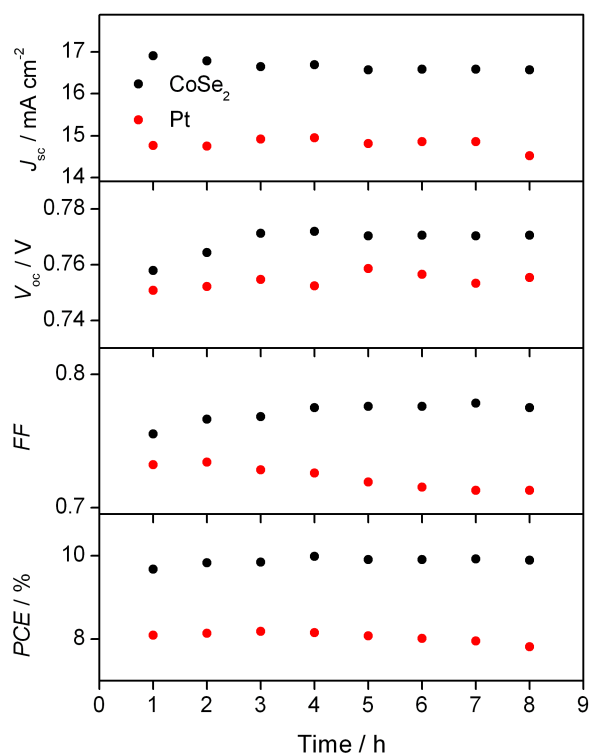

**Figure S2.** Long-term stability for the CoSe<sub>2</sub>- and Pt-based DSSCs. The DSSCs were stored under daylight and measured every day.

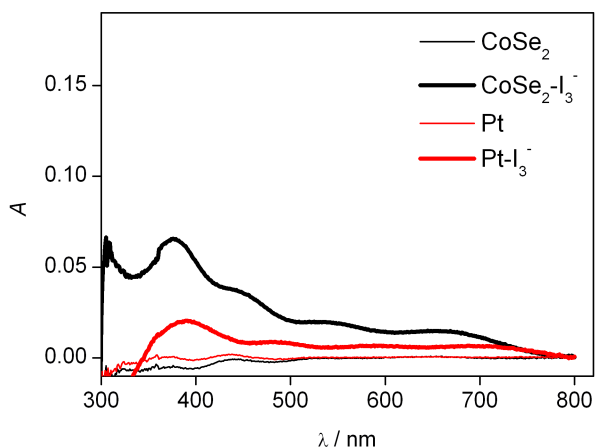

**Figure S3.** UV-vis absorption spectra for CoSe<sub>2</sub> and platinized Pt films before (thin black for CoSe<sub>2</sub>, thin red for Pt) and after adsorbing I<sub>3</sub><sup>-</sup> species (thick black for CoSe<sub>2</sub>, thick red for Pt). The films were dipped in the electrolyte for 10 min for adsorption of I<sub>3</sub><sup>-</sup> species on the counter electrode. The films were washed with acetonitrile followed by drying and then measurements.
